# Supplementary material for: Hypermethylation of MIR21 in CD4+ T cells from patients with relapsing-remitting multiple sclerosis associates with lower miRNA-21 levels and concomitant up-regulation of its target genes
Source: PubMed Central journal article supplement (PMC5794671; doi:10.1177/1352458517721356), 2017-08-02
Supplement: NIHMS889260-supplement-supplement_1.pdf [file NIHMS889260-supplement-supplement_1.pdf]

## Supplementary Figure 1

|                            | cg16936953 | cg12054453 | cg01409343 | cg18942579 | cg02782634 | cg14032089 | cg27023597 | cg04276626 | cg02515217 | cg15759721 | cg07181702 | Pearson r |
|----------------------------|------------|------------|------------|------------|------------|------------|------------|------------|------------|------------|------------|-----------|
| cg16936953 VMP1 (Exon)     | 1.00       | 0.89       | 0.94       | 0.93       | 0.90       | 0.89       | 0.90       | 0.82       | 0.94       | 0.92       | 0.89       | 0.00      |
| cg12054453 VMP1 (Exon)     | 0.89       | 1.00       | 0.88       | 0.87       | 0.74       | 0.73       | 0.82       | 0.67       | 0.82       | 0.76       | 0.75       | 0.10      |
| cg01409343 VMP1 (Exon)     | 0.94       | 0.88       | 1.00       | 0.92       | 0.81       | 0.83       | 0.87       | 0.74       | 0.89       | 0.85       | 0.86       | 0.20      |
| cg18942579 VMP1 (Intron)   | 0.93       | 0.87       | 0.92       | 1.00       | 0.83       | 0.79       | 0.89       | 0.72       | 0.87       | 0.85       | 0.83       | 0.30      |
| cg02782634 VMP1 (Intron)   | 0.90       | 0.74       | 0.81       | 0.83       | 1.00       | 0.89       | 0.78       | 0.91       | 0.91       | 0.96       | 0.91       | 0.40      |
| cg14032089 MIR21 (TSS1500) | 0.89       | 0.73       | 0.83       | 0.79       | 0.89       | 1.00       | 0.81       | 0.87       | 0.91       | 0.91       | 0.87       | 0.50      |
| cg27023597 MIR21 (TSS1500) | 0.90       | 0.82       | 0.87       | 0.89       | 0.78       | 0.81       | 1.00       | 0.73       | 0.87       | 0.83       | 0.84       | 0.60      |
| cg04276626 MIR21 (TSS200)  | 0.82       | 0.67       | 0.74       | 0.72       | 0.91       | 0.87       | 0.73       | 1.00       | 0.87       | 0.91       | 0.86       | 0.70      |
| cg02515217 MIR21 (TSS200)  | 0.94       | 0.82       | 0.89       | 0.87       | 0.91       | 0.91       | 0.87       | 0.87       | 1.00       | 0.92       | 0.94       | 0.80      |
| cg15759721 MIR21 (Body)    | 0.92       | 0.76       | 0.85       | 0.85       | 0.96       | 0.91       | 0.83       | 0.91       | 0.92       | 1.00       | 0.92       | 0.90      |
| cg07181702 MIR21 (Body)    | 0.89       | 0.75       | 0.86       | 0.83       | 0.91       | 0.87       | 0.84       | 0.86       | 0.94       | 0.92       | 1.00       | 1.00      |

**Supplementary Figure 1: Correlation between DNA methylation levels at 11 CpGs in the region.**

Analysis was performed on  $\beta$ -values from RR-MS, SP-MS and HC (n=32) using the Pearson correlation test and Pearson's r is displayed.

Supplementary Figure 1: Correlation between DNA methylation levels at 11 CpGs in the region.

154x64mm (600 x 600 DPI)

## Supplementary Methods

### Samples

#### *Multiple Sclerosis cohorts*

A discovery cohort comprised RR-MS, SP-MS and matched healthy controls (HC) recruited at the local Neurology clinic at the Karolinska University Hospital in Stockholm, Sweden. Detailed patient demographics are provided in Table 1. An independent cohort comprising RR-MS, SP-MS, inflammatory neurological disease controls (INDC) and HC was recruited at the same clinic and used for validation. Detailed patient demographics are provided in Table S1. All patients had given informed consent and the study was approved by the ethical review board of Stockholm (2009/2107-31/2 and 2010/879-31/1).

#### *The GOLDN cohort*

The Genetics of Lipid Lowering Drugs and Diet Network (GOLDN) study, aimed at investigating genetic and epigenetic determinants of response to interventions targeting blood lipid levels, recruited families with at least two siblings from the National Heart, Lung, and Blood Institute Family Heart Study sites at Minneapolis and Salt Lake City. The study obtained epigenome-wide DNA methylation data on CD4<sup>+</sup> T-cells using the Illumina Infinium 450K Human Methylation Beadchip as described in previous publications<sup>1-3</sup>. Genotyping of GOLDN participants was performed using the Affymetrix Genome-Wide Human 6.0 array<sup>4</sup>. After all quality control procedures were performed, 717 out of 994 participants had both genetic and epigenetic data and were included in this analysis. The Institutional Review Board (IRB) approved the GOLDN study (E160405007).

#### **Preparation of CD4<sup>+</sup> T cells**

For the discovery cohort peripheral blood mononuclear cells (PBMCs) were isolated and collected in sodium heparin tubes using a standard Ficoll (GE Healthcare) procedure. Cells were separated using density gradient centrifugation, collected from the interphase, washed twice in Dulbecco's phosphate buffered saline and prepared for cell sorting. Sorting of the CD4<sup>+</sup> T cell population was performed by adding fluorochrome-conjugated antibodies against human CD4 (Becton Dickinson) and CD3 (BD Bioscience) using a MoFlo high-speed cell sorter (Beckman Coulter).

For the validation cohort PBMCs were isolated from peripheral blood using sodium citrate-containing cell preparation tubes (BD Vacutainer™ CPT™ Tube, Becton Dickinson), Sorting of the CD4<sup>+</sup> T cell population was performed by adding microbeads against human CD4 using an autoMACS® cell separator (Miltenyi Biotec).

Directly after sorting, cell pellets were frozen and kept at -80°C until DNA/RNA extraction.

### **DNA extraction**

Extraction of genomic DNA was carried out using a Gen Elute Mammalian Genomic DNA Miniprep kit (Sigma-Aldrich). The amount and quality of DNA was accessed by NanoDrop ND-1000 Spectrophotometer (NanoDrop Technologies).

### **DNA methylation analysis**

DNA methylation was profiled using the Infinium HumanMethylation450 BeadChip (Illumina) arrays at the bioinformatics and expression analysis core facility (BEA) at Karolinska Institutet. Methylation data was individually analyzed in R using the Minfi and ChAMP package, probes containing SNPs within 2 bp of the CpG were removed, and type 1 and type 2 probes were normalized using quantile normalization and BMIQ<sup>5</sup>. The sex of the patients was confirmed

using the GetSex function from the Minfi package and the cell type was confirmed using the cell type deconvolution method from Minfi based on the Houseman algorithm<sup>6</sup>. Significant cofounders were identified using PCA. Batch effects were corrected using ComBat from the SVA package<sup>7</sup>. Differentially methylated positions (DMPs) were determined by using the limma package<sup>8</sup> applying a linear modeling that included MS status, age and sex as co-variates. Differences were calculated between HC and RR-MS and RR-MS and SP-MS. Additionally any significant differences between all three groups were identified using the moderated F-statistic test included in eBayes<sup>9</sup>.

### **Meta-analysis**

Meta-analysis on the 11 CpG probes was performed by combining the outcomes of the analyses between RR-MS and HC using  $\beta$ -values from the cohorts from Sweden (n=24), Norway (n=30) and Australia (n=40). Comparison of RR-MS with HC was performed on  $\beta$ -values and corrected for age in the Norwegian and Australian cohort (comprising females only), and age and sex in the Swedish cohort. Due to the strong impact of age on the methylation in the *MIR21* region only individuals with available age information and age-matched HC were retained for analysis. Similar data were obtained with all individuals (data not shown). We used two different meta-analysis methodologies: (1) the “summation of p value” method for combining p-values<sup>10</sup>, and (2) the effect-size based meta-analysis using a fixed effect model (estimated by restricted maximum-likelihood) since there was no evidence of significant heterogeneity<sup>11</sup>. Similar outcome to “summation of p value” was obtained using the Fisher’s test for combining p-values (data not shown). To conduct the meta-analysis we used the R packages metaphor and metap.

### **Pyrosequencing**

A representative CpG within miR21 locus exhibiting significant DNA methylation differences in the Illumina 450K array (cg07181702) was selected for pyrosequencing validation. Primers were designed using PyroMark Design software (Qiagen) (Fwd: GAA ATG TTT GGG TTT TTT TGG TTT G, Rev: ACC CAT CCA CTA ATA TTA CCA TAA AAT TCA, sequencing: ATT CAA CAA TCA ACA TCA AT). Genomic DNA (200 ng) was bisulfite-converted using an EpiTect Bisulfite Kit (Qiagen), bisulfite-converted DNA was eluted in 20 µl of elution buffer and ~15 ng was applied as a template in the PCR performed with the PyroMarks PCR kit (Qiagen) using 5'-biotinylated forward primer. The entire PCR product, 4 pmol of the sequencing primer, and streptavidin sepharose high-performance beads (GR Healthcare), were used for pyrosequencing on the PSQ 96 system and PyroMark Gold 96 reagent kit (Qiagen). The PyroMark CpG software 1.0.11 (Qiagen) served for data analysis.

### **RNA extraction**

For subsequent qPCR analysis total RNA from the discovery and independent sample cohort was isolated using standard TRIzol protocol (Invitrogen) and Allprep Total RNA/DNA Kit (Qiagen), respectively, according to manufacturer's recommendations. RNA concentration and purity were determined by measurement of A260/A280 ratios with a NanoDrop ND-1000 Spectrophotometer (NanoDrop Technologies). For subsequent transcriptome analysis RNA, was extracted using the miRNeasy Kit (Qiagen) according to manufacturer's recommendations. The RNA integrity was determined using Bioanalyzer (Agilent Technologies). All samples had an RNA integrity number (RIN) above 8. All RNA samples obtained from the different preparations were immediately frozen and stored at -80°C until further use.

### **Quantitative real-time PCR analysis**

Expression levels of miR-21 were determined by quantitative real-time PCR (qRT-PCR) using TaqMan MicroRNA Assay Kit specific for mature miR-21 (No: 000397, Applied Biosystems) following the manufacturer's protocol. Expression levels were quantified by the CFX384 Real-Time PCR Detection System and analyzed using CFX manager software (Bio-Rad). Relative quantification of miRNA was quantified using the  $2^{-\Delta\Delta CT}$  method and normalized against RNU48 for each sample. For *VMPI* expression detection cDNA was converted from RNA using the Bio-Rad iScript cDNA synthesis Kit (Bio-Rad). *VMPI* expression was accessed by qPCR (fwd 5'-GGT GCT GAA CCA AGA TGA-3'; rev 5'-GCA CTG TGT TGG CGT ACA G-3') using CFX384 Real-Time detection system and analyzed by CFX manager software (Bio-Rad). Cycling conditions were as follows 95C° for 2 min followed by 40 repeats at 95 C° for 20 s, 58C° for 20 s and 72C° for 30 s. *VMPI* expression was normalized to beta actin reference gene (fwd 5'-GAC TTC GAG CAA GAG ATG G-3' rev 5'-GCA CTG TGT TGG CGT ACA G-3') for every sample and quantified using the  $2^{-\Delta\Delta CT}$  method. Statistical analysis between the groups was performed using Student's t-test (for two groups) and ANOVA with Bonferroni correction for selected groups (for more than two groups), and correlation between expression and methylation levels was assessed using Pearson's correlation test in GraphPad Prism 5 (GraphPad).

### **Genotyping**

Allelic discrimination of rs8070345 (in the *VMPI* locus) was performed using a predesigned TaqMan SNP Genotyping Assay (Cat. No: 4351379, Applied Biosystems) according to the manufacturer's protocol. PCR amplification was done in a CFX384 Real-Time PCR Detection System (Bio-Rad) and results were read on a QuantStudio™ 7 Flex system (Applied Biosystems).

### **Association and correlation analysis**

In the GOLDN cohort we used the *lmekin* function of the R *kinship* package to fit linear mixed effects models with the methylation  $\beta$ -value at each of the interrogated CpG sites as the outcome and the following predictors: SNP, age, sex, study site (Utah vs. Minnesota), current smoking (yes vs. no), body mass index, 4 principal components capturing T-cell purity<sup>3</sup> (as fixed effects), and family (as a random effect). We additionally fit linear regression models with the methylation  $\beta$ -value at each CpG site as the outcome and the non-genetic predictors, namely age, smoking, and BMI, and the T-cell purity principal components.

In the Multiple Sclerosis cohort we fit linear regression model with the methylation  $\beta$ -value at each of the interrogated CpG sites as the outcome and the following predictors: SNP, age and sex. We additionally fit linear regression model with the methylation  $\beta$ -value at each of the interrogated CpG sites as the outcome and the following predictors: age, sex, Multiple Sclerosis Severity Score (MSSS) and lymphocyte count. All analyses were done in Rcmd.

### **Transcriptome analysis**

Total RNA (500ng) with RIN above 8.0, was subjected to the Illumina TruSeq Stranded mRNA Library Preparation Protocol with Dual Indexes (Cat. No: RS-122-2013, Illumina). Libraries were quantified using the Kapa Library Quantification Kit (Cat. No: KK4824, Illumina). Sequencing was carried out on the Illumina HiSeq 2500 to generate 75bp Paired End Data with an average of 10M reads above Q30. The sequence reads were mapped to hg19 reference with Tophat2<sup>12</sup> and HTSeq<sup>13</sup> was used to quantify counts-per-gene. The expression data from CD4<sup>+</sup> cells (34 samples) were normalized with Conditional Quantile Normalization (CQN) method<sup>14</sup> followed by batch reduction by ComBat<sup>7</sup>. Differential expression analysis was conducted using limma tool<sup>8</sup> in order to identify differences between disease types.

### **Target gene enrichment analysis**

Genes identified as miR-21 targets in Jurkat T cells by RIP-Chip (Czepiel *et al.*, ISBN 978-90-367-6788-0) and genes predicted and experimentally validated to be miR-21 targets by TarBase7.0<sup>15</sup> were selected for further investigation. Deviation of up- and down-regulated miR-21 target genes from the expected ratio of up- and down-regulated genes in RNAseq analysis (for p-values of 0.1, 0.05 and 0.01) was calculated for both lists of miR-21 target genes using a Chi-squared test. Enrichment of up- and down-regulated targets among differentially expressed targets in RNAseq analysis (for p-values of 0.1, 0.05 and 0.01) was calculated for both lists of miR-21 target genes using the Fisher's exact test in GraphPad Prism 5 (GraphPad Software, San Diego, CA, USA). Similar results were obtained when predicted miR-21 target genes were based on being predicted by a minimum of the two of the following tools: miR-21 targets in Jurkat cells, miRTar, TarBase7.0, TargetScan7.1 and microT-CDS.

### **Ingenuity Pathways Analysis**

Two list of genes, 1) differentially expressed genes between RR-MS and HC ( $p < 0.05$ ) and 2) TarBase7.0-predicted miR-21 target genes up-regulated in RR-MS compared to HC ( $p < 0.05$ ) from RNAseq analysis were uploaded to the Ingenuity Pathways Analysis platform (Qiagen). The first list was used to assess significant up-stream regulators that can explain observed gene expression changes estimated by the overlap p-value, which is calculated using Fisher's exact test and significance is generally attributed to  $p < 0.01$ . The activation z-score is used to infer the activation states of predicted upstream regulators and  $z < -2$  and  $z > 2$  indicate significantly inhibited and activated upstream regulators, respectively. The second list of genes was used to infer biological functions that might be affected by miR-21. Right-tailed Fisher's exact test was used to calculate a p-value determining the probability that each biological function assigned to



that data set is due to chance alone. Benjamini-Hochberg correction for multiple testing was used to calculate significant p-values.

## References

1. Absher DM, Li X, Waite LL, et al. Genome-wide DNA methylation analysis of systemic lupus erythematosus reveals persistent hypomethylation of interferon genes and compositional changes to CD4+ T-cell populations. *PLoS genetics*. 2013; 9: e1003678.
2. Zhi D, Aslibekyan S, Irvin MR, et al. SNPs located at CpG sites modulate genome-epigenome interaction. *Epigenetics*. 2013; 8: 802-6.
3. Irvin MR, Zhi D, Joehanes R, et al. Epigenome-wide association study of fasting blood lipids in the Genetics of Lipid-lowering Drugs and Diet Network study. *Circulation*. 2014; 130: 565-72.
4. Aslibekyan S, Kabagambe EK, Irvin MR, et al. A genome-wide association study of inflammatory biomarker changes in response to fenofibrate treatment in the Genetics of Lipid Lowering Drug and Diet Network. *Pharmacogenetics and genomics*. 2012; 22: 191-7.
5. Marabita F, Almgren M, Lindholm ME, et al. An evaluation of analysis pipelines for DNA methylation profiling using the Illumina HumanMethylation450 BeadChip platform. *Epigenetics*. 2013; 8: 333-46.
6. Houseman EA, Accomando WP, Koestler DC, et al. DNA methylation arrays as surrogate measures of cell mixture distribution. *BMC bioinformatics*. 2012; 13: 86.
7. Johnson WE, Li C and Rabinovic A. Adjusting batch effects in microarray expression data using empirical Bayes methods. *Biostatistics*. 2007; 8: 118-27.
8. Ritchie ME, Phipson B, Wu D, et al. limma powers differential expression analyses for RNA-sequencing and microarray studies. *Nucleic acids research*. 2015; 43: e47.
9. Smyth GK. Linear models and empirical bayes methods for assessing differential expression in microarray experiments. *Statistical applications in genetics and molecular biology*. 2004; 3: Article3.
10. Edgington ES. An additive method for combining probability values from independent experiments. *J Psychol*. 1972; 80: 351-63.

11. Hedges LV and Olkin I. Statistical methods for meta-analysis. *San Diego: Academic Press*. 1985.
12. Kim D, Pertea G, Trapnell C, Pimentel H, Kelley R and Salzberg SL. TopHat2: accurate alignment of transcriptomes in the presence of insertions, deletions and gene fusions. *Genome biology*. 2013; 14: R36.
13. Anders S, Pyl PT and Huber W. HTSeq--a Python framework to work with high-throughput sequencing data. *Bioinformatics*. 2015; 31: 166-9.
14. Hansen KD, Irizarry RA and Wu Z. Removing technical variability in RNA-seq data using conditional quantile normalization. *Biostatistics*. 2012; 13: 204-16.
15. Vlachos IS, Paraskevopoulou MD, Karagkouni D, et al. DIANA-TarBase v7.0: indexing more than half a million experimentally supported miRNA:mRNA interactions. *Nucleic acids research*. 2015; 43: D153-9.

| Cohort                                                 | Status          | Gender              | Age        | EDSS          | MSSS          |
|--------------------------------------------------------|-----------------|---------------------|------------|---------------|---------------|
| discovery                                              | RR-MS remission | F                   | 37         | 3             | 2.91          |
| discovery                                              | RR-MS remission | F                   | 40         | 0             | 0.67          |
| discovery                                              | RR-MS remission | M                   | 44         | 1.5           |               |
| discovery                                              | RR-MS remission | M                   | 40         | 0.5           | 2.44          |
| discovery                                              | RR-MS remission | F                   | 26         | 1             | 5.87          |
| discovery                                              | RR-MS remission | F                   | 29         | 2             | 5.87          |
| discovery                                              | RR-MS remission | M                   | 34         | 2             | 4.3           |
| discovery                                              | RR-MS remission | F                   | 35         | 1             | 1.13          |
| discovery                                              | RR-MS remission | F                   | 46         | 5             | 3.44          |
| discovery                                              | RR-MS remission | F                   | 37         | 1.5           | 3.34          |
| discovery                                              | RR-MS remission | M                   | 29         | 1             | 0.88          |
| discovery                                              | RR-MS remission | M                   | 32         | 3             | 3.05          |
| discovery                                              | RR-MS remission | F                   | 57         | 2.5           | 4.13          |
| discovery                                              | RR-MS remission | F                   | 41         | 2             | 0.71          |
| discovery                                              | SP-MS           | M                   | 45         | 4             | 2.82          |
| discovery                                              | SP-MS           | M                   | 50         | 6.5           | 5.99          |
| discovery                                              | SP-MS           | M                   | 56         | 6.5           | 5.99          |
| discovery                                              | SP-MS           | F                   | 62         | 7             | 7.97          |
| discovery                                              | SP-MS           | F                   | 63         | 5             |               |
| discovery                                              | SP-MS           | F                   | 56         | 8             | 8.75          |
| discovery                                              | SP-MS           | F                   | 35         | 5             | 7.32          |
| discovery                                              | SP-MS           | F                   | 60         | 5             | 5.82          |
| discovery                                              | SP-MS           | M                   | 44         | 6             | 5.43          |
| discovery                                              | SP-MS           | F                   | 53         | 6             | 6.01          |
| discovery                                              | SP-MS           | F                   | 53         | 6.5           | 5.61          |
| discovery                                              | SP-MS           | F                   | 50         | 3.5           | 4.55          |
| discovery                                              | HC              | F                   | 60         |               |               |
| discovery                                              | HC              | F                   | 44         |               |               |
| discovery                                              | HC              | M                   | 31         |               |               |
| discovery                                              | HC              | F                   | 35         |               |               |
| discovery                                              | HC              | M                   | 31         |               |               |
| discovery                                              | HC              | F                   | 48         |               |               |
| discovery                                              | HC              | F                   | 28         |               |               |
| discovery                                              | HC              | M                   | 30         |               |               |
| discovery                                              | HC              | F                   | 30         |               |               |
| discovery                                              | HC              | F                   | 28         |               |               |
| discovery                                              | HC              | F                   | 27         |               |               |
| discovery                                              | HC              | F                   | 32         |               |               |
| discovery                                              | HC              | F                   | 62         |               |               |
| discovery                                              | HC              | M                   | 44         |               |               |
| discovery                                              | HC              | M                   | 54         |               |               |
| <b>Summarized discovery cohort 450K; mean (range):</b> |                 |                     |            |               |               |
| RR-MS                                                  |                 | 9F (75%) / 3M (25%) | 38 (26-57) | 2,0 (0-5,0)   | 2,9 (0,7-5,9) |
| SP-MS                                                  |                 | 4F (50%) / 4F (50%) | 50 (35-63) | 5,2 (3,5-6,5) | 5,4 (2,8-7,3) |

|                                                           |                 |                     |            |               |               |
|-----------------------------------------------------------|-----------------|---------------------|------------|---------------|---------------|
| HC                                                        |                 | 8F (67%) / 4M (33%) | 42 (28-62) | N/A           | N/A           |
| <b>Summarized discovery cohort RNA-seq, mean (range):</b> |                 |                     |            |               |               |
| RR-MS                                                     |                 | 6F (54%) / 5M (46%) | 36 (26-46) | 1,8 (0-5,0)   | 3,1 (0,7-5,9) |
| SP-MS                                                     |                 | 7F (64%) / 4M (36%) | 52 (35-63) | 6,0 (4,0-8,0) | 6,2 (2,8-8,8) |
| HC                                                        |                 | 7F (58%) / 5M (42%) | 40 (27-62) | N/A           | N/A           |
| validation                                                | CIS - RR-MS     | F                   | 41         |               |               |
| validation                                                | CIS - RR-MS     | F                   | 50         |               |               |
| validation                                                | RR-MS relapse   | F                   | 54         |               |               |
| validation                                                | RR-MS relapse   | F                   | 38         |               |               |
| validation                                                | RR-MS remission | F                   | 36         |               |               |
| validation                                                | RR-MS remission | F                   | 33         |               |               |
| validation                                                | RR-MS remission | M                   | 48         |               |               |
| validation                                                | RR-MS remission | F                   | 34         |               |               |
| validation                                                | RR-MS remission | F                   | 52         |               |               |
| validation                                                | RR-MS remission | F                   | 31         |               |               |
| validation                                                | RR-MS remission | F                   | 27         |               |               |
| validation                                                | RR-MS remission | F                   | 73         |               |               |
| validation                                                | RR-MS remission | M                   | 23         |               |               |
| validation                                                | RR-MS remission | M                   | 37         |               |               |
| validation                                                | RR-MS remission | M                   | 52         |               |               |
| validation                                                | RR-MS remission | M                   | 36         |               |               |
| validation                                                | RR-MS remission | M                   | 45         |               |               |
| validation                                                | RR-MS remission | F                   | 29         |               |               |
| validation                                                | RR-MS remission | F                   | 32         |               |               |
| validation                                                | RR-MS remission | F                   | 29         |               |               |
| validation                                                | RR-MS remission | M                   | 34         |               |               |
| validation                                                | RR-MS remission | F                   | 40         |               |               |
| validation                                                | RR-MS remission | F                   | 34         |               |               |
| validation                                                | RR-MS remission | F                   | 27         |               |               |
| validation                                                | RR-MS remission | M                   | 28         |               |               |
| validation                                                | RR-MS remission | F                   | 31         |               |               |
| validation                                                | RR-MS remission | F                   | 50         |               |               |
| validation                                                | RR-MS remission | F                   | 35         |               |               |
| validation                                                | RR-MS remission | F                   | 31         |               |               |
| validation                                                | RR-MS remission | F                   | 24         |               |               |
| validation                                                | SP-MS           | F                   | 54         |               |               |
| validation                                                | SP-MS           | M                   | 47         |               |               |
| validation                                                | SP-MS           | M                   | 57         |               |               |
| validation                                                | SP-MS           | F                   | 41         |               |               |
| validation                                                | SP-MS           | F                   | 51         |               |               |
| validation                                                | SP-MS           | F                   | 65         |               |               |
| validation                                                | SP-MS           | F                   | 36         |               |               |
| validation                                                | SP-MS           | F                   | 51         |               |               |
| validation                                                | SP-MS           | F                   | 52         |               |               |
| validation                                                | SP-MS           | F                   | 59         |               |               |

|                              |       |                      |            |  |  |
|------------------------------|-------|----------------------|------------|--|--|
| validation                   | SP-MS | M                    | 59         |  |  |
| validation                   | HC    | F                    | 22         |  |  |
| validation                   | HC    | F                    | 23         |  |  |
| validation                   | HC    | M                    | 35         |  |  |
| validation                   | HC    | M                    | 28         |  |  |
| validation                   | HC    | F                    | 33         |  |  |
| validation                   | HC    | M                    | 35         |  |  |
| validation                   | HC    | M                    | 23         |  |  |
| validation                   | HC    | M                    | 21         |  |  |
| validation                   | HC    | F                    | 22         |  |  |
| validation                   | HC    | F                    | 34         |  |  |
| validation                   | HC    | M                    | 30         |  |  |
| validation                   | HC    | M                    | 40         |  |  |
| validation                   | INDC  | F                    | 47         |  |  |
| validation                   | INDC  | M                    | 53         |  |  |
| validation                   | INDC  | F                    | 32         |  |  |
| validation                   | INDC  | F                    | 64         |  |  |
| validation                   | INDC  | F                    | 40         |  |  |
| validation                   | INDC  | M                    | 51         |  |  |
| validation                   | INDC  | F                    | 68         |  |  |
| validation                   | INDC  | F                    | 53         |  |  |
| validation                   | INDC  | F                    | 74         |  |  |
| Summarized validation Cohort |       |                      |            |  |  |
| RR-MS patients               |       | 22F (73%) / 8M (27%) | 38 (23-73) |  |  |
| SP-MS patients               |       | 8F (73%) / 3M (27%)  | 52 (36-65) |  |  |
| HC                           |       | 5F (42%) / 7M (58%)  | 29 (21-40) |  |  |
| INDC                         |       | 7F (78%) / 2M (22%)  | 54 (32-74) |  |  |

| Lymphocytes | Treatment at sampling | Treatment prior to sampling | 450K | RNAseq |
|-------------|-----------------------|-----------------------------|------|--------|
| 1.7         | never Tx              |                             | X    | X      |
| 1.8         | never Tx              |                             | X    | X      |
| 1.8         | never Tx              |                             | X    | X      |
|             | never Tx              |                             |      | X      |
| 2.4         | never Tx              |                             | X    | X      |
| 1.7         | never Tx              |                             | X    | X      |
|             | never Tx              |                             |      | X      |
| 2.2         | no Tx                 | Fingolimod                  | X    | X      |
| 1.6         | IVIg                  |                             | X    | X      |
| 2.7         | study drug            |                             | X    |        |
| 1.6         | no Tx                 | IFN                         | X    | X      |
| 2.7         | no Tx                 | IFN                         | X    | X      |
| 1.9         | no Tx                 | study drug                  | X    |        |
| 1.6         | never Tx              |                             | X    |        |
| 2.3         | no Tx                 | IFN                         | X    | X      |
| 2.0         | no Tx                 | study drug                  | X    | X      |
| 2.2         | never Tx              |                             | X    | X      |
|             | no Tx                 | IFN                         |      | X      |
| 2.3         | never Tx              |                             | X    | X      |
|             | no Tx                 | Copaxone, IFN               |      | X      |
| 1.8         | no Tx                 | IFN, Copaxone               | X    | X      |
| 1.5         | no Tx                 | IFN, Mitoxantrone           | X    | X      |
| 2.0         | no Tx                 | IFN, study drug             | X    | X      |
| 1.3         | no Tx                 | IFN, Mitoxantrone           |      | X      |
| 2.3         | no Tx                 | IFN, study drug             |      | X      |
| 1.4         | no Tx                 | IFN                         | X    |        |
|             |                       |                             | X    | X      |
|             |                       |                             | X    |        |
|             |                       |                             | X    | X      |
|             |                       |                             | X    | X      |
|             |                       |                             | X    | X      |
|             |                       |                             |      | X      |
|             |                       |                             |      | X      |
|             |                       |                             | X    |        |
|             |                       |                             | X    |        |
|             |                       |                             |      | X      |
|             |                       |                             | X    | X      |
|             |                       |                             | X    | X      |
|             |                       |                             | X    | X      |
|             |                       |                             | X    | X      |

2,0 (1,6-2,7)

1,9 (1,4-2,3)

|               |            |        |  |  |
|---------------|------------|--------|--|--|
| N/A           |            |        |  |  |
| 1,9 (1,6-2,7) |            |        |  |  |
| 2,0 (1,3-2,3) |            |        |  |  |
| N/A           |            |        |  |  |
|               | never Tx   |        |  |  |
|               | never Tx   |        |  |  |
|               | never Tx   |        |  |  |
|               | never Tx   |        |  |  |
|               | Avonex     |        |  |  |
|               | never Tx   |        |  |  |
|               | Rebif      |        |  |  |
|               | never Tx   |        |  |  |
|               | never Tx   |        |  |  |
|               | never Tx   |        |  |  |
|               | Avonex     |        |  |  |
|               | never Tx   |        |  |  |
|               | never Tx   |        |  |  |
|               | never Tx   |        |  |  |
|               | never Tx   |        |  |  |
|               | Avonex     |        |  |  |
|               | Avonex     |        |  |  |
|               | never Tx   |        |  |  |
|               | never Tx   |        |  |  |
|               | never Tx   |        |  |  |
|               | never Tx   |        |  |  |
|               | never Tx   |        |  |  |
|               | never Tx   |        |  |  |
|               | never Tx   |        |  |  |
|               | never Tx   |        |  |  |
|               | Avonex     |        |  |  |
|               | never Tx   |        |  |  |
|               | never Tx   |        |  |  |
|               | Avonex     |        |  |  |
|               | Copaxone   |        |  |  |
|               | no Tx      | Avonex |  |  |
|               | Betaferon  |        |  |  |
|               | never Tx   |        |  |  |
|               | never Tx   |        |  |  |
|               | never Tx   |        |  |  |
|               | never Tx   |        |  |  |
|               | never Tx   |        |  |  |
|               | never Tx   |        |  |  |
|               | never Tx   |        |  |  |
|               | Study drug |        |  |  |
|               | Avonex     |        |  |  |
|               | never Tx   |        |  |  |











**Supplementary Table 2: Differential expression in CD4+ T cells of predicted miR-21 target genes between Jurkat T cells by RIP-Chip and genes predicted and experimentally validated to be miR-21 targets by**

| Jurkat target ID | Gene Name      | Description                                                           | logFC | AveExpr | P.Value  | TarBase7.0 target ID |
|------------------|----------------|-----------------------------------------------------------------------|-------|---------|----------|----------------------|
| ENSG00000180667  | <b>YOD1</b>    | YOD1 deubiquitinase                                                   | 0.30  | 5.09    | 3.28E-04 | ENSG00000164284      |
| ENSG00000100354  | TNRC6B         | trinucleotide repeat binding protein 6B                               | 0.13  | 6.71    | 4.99E-03 | ENSG00000180667      |
| ENSG00000146676  | <b>PURB</b>    | purine rich element binding protein                                   | 0.17  | 5.75    | 9.29E-03 | ENSG00000113369      |
| ENSG00000145715  | RASA1          | RAS p21 protein binding domain containing GTPase-activating protein 1 | 0.17  | 6.59    | 1.23E-02 | ENSG00000143753      |
| ENSG00000110987  | <b>BCL7A</b>   | BCL tumor suppressor protein 7A                                       | 0.63  | 2.13    | 2.20E-02 | ENSG00000180979      |
| ENSG00000197579  | <b>TOPORS</b>  | TOP1 binding protein 2                                                | 0.12  | 5.20    | 3.33E-02 | ENSG00000150753      |
| ENSG00000152518  | ZFP36L2        | ZFP36 ring finger protein 2                                           | 0.18  | 11.05   | 3.64E-02 | ENSG00000253719      |
| ENSG00000131023  | <b>LATS1</b>   | large tumor suppressor kinase 1                                       | -0.07 | 5.87    | 3.88E-02 | ENSG00000131381      |
| ENSG00000124209  | <b>RAB22A</b>  | RAB22A, member of RAS oncogene family                                 | 0.11  | 4.57    | 4.50E-02 | ENSG00000141582      |
| ENSG00000138336  | <b>TET1</b>    | tet methylcytosine dioxygenase 1                                      | -0.26 | 1.57    | 4.81E-02 | ENSG00000146676      |
| ENSG00000076641  | <b>PAG1</b>    | phosphoprotein 1                                                      | 0.18  | 8.28    | 7.03E-02 | ENSG00000119844      |
| ENSG00000165244  | <b>ZNF367</b>  | zinc finger protein 367                                               | 0.16  | 3.85    | 7.29E-02 | ENSG00000118402      |
| ENSG00000152520  | PAN3           | PAN3 poly(A) specific binding protein                                 | 0.09  | 7.10    | 7.60E-02 | ENSG00000164466      |
| ENSG00000166225  | <b>FRS2</b>    | fibroblast growth factor receptor tyrosine kinase 2                   | 0.08  | 4.97    | 9.50E-02 | ENSG00000163629      |
| ENSG00000171316  | CHD7           | chromodomain helicase domain protein 7                                | 0.14  | 5.57    | 1.10E-01 | ENSG00000104643      |
| ENSG00000107679  | PLEKHA1        | pleckstrin homology domain containing A1                              | -0.12 | 5.70    | 1.25E-01 | ENSG00000145907      |
| ENSG00000171132  | PRKCE          | protein kinase C, epsilon                                             | 0.12  | 2.63    | 1.31E-01 | ENSG00000196776      |
| ENSG00000110848  | CD69           | CD69 molecule                                                         | -0.19 | 10.25   | 1.42E-01 | ENSG00000110987      |
| ENSG00000155640  | -              | -                                                                     | 0.16  | 4.26    | 1.46E-01 | ENSG00000070214      |
| ENSG00000174010  | <b>KLHL15</b>  | kelch like family member 15                                           | 0.12  | 4.55    | 1.48E-01 | ENSG00000173698      |
| ENSG00000134698  | <b>AGO4</b>    | argonaute 4, RNA induced silencing complex effector                   | 0.17  | 5.75    | 1.65E-01 | ENSG00000109787      |
| ENSG00000152601  | MBNL1          | muscleblind like protein 1                                            | -0.06 | 9.23    | 1.86E-01 | ENSG00000119778      |
| ENSG00000197323  | <b>TRIM33</b>  | tripartite motif containing 33                                        | 0.04  | 6.56    | 1.95E-01 | ENSG00000185658      |
| ENSG00000138593  | SECISBP2L      | SECIS binding protein 2-like                                          | 0.05  | 6.04    | 1.96E-01 | ENSG00000158079      |
| ENSG00000162599  | NFIA           | nuclear factor I A                                                    | 0.13  | 1.27    | 2.43E-01 | ENSG00000096060      |
| ENSG00000177189  | <b>RPS6KA3</b> | ribosomal protein S6 kinase family class A member 3                   | 0.06  | 7.43    | 2.83E-01 | ENSG00000119899      |
| ENSG00000188895  | MSL1           | male specific lethal 1                                                | 0.07  | 7.40    | 2.87E-01 | ENSG00000196459      |
| ENSG00000118922  | KLF12          | Kruppel like factor 12                                                | 0.05  | 7.01    | 2.98E-01 | ENSG00000100664      |
| ENSG00000181690  | <b>PLAG1</b>   | PLAG1 zinc finger protein                                             | 0.14  | 4.53    | 2.99E-01 | ENSG00000143013      |
| ENSG00000162378  | <b>ZYG11B</b>  | zyg-11 family member B                                                | 0.05  | 5.21    | 3.05E-01 | ENSG00000164190      |
| ENSG00000204217  | <b>BMPR2</b>   | bone morphogenetic protein receptor type 2                            | 0.06  | 4.33    | 3.20E-01 | ENSG00000048471      |
| ENSG00000081014  | AP4E1          | adaptor related protein complex 4, epsilon 1                          | -0.04 | 4.62    | 3.29E-01 | ENSG00000197579      |
| ENSG00000185009  | <b>AP3M1</b>   | adaptor related protein complex 3, medium 1                           | -0.04 | 5.67    | 3.68E-01 | ENSG00000127337      |
| ENSG00000107864  | <b>CPEB3</b>   | cytoplasmic polyoma binding protein 3                                 | 0.07  | 2.84    | 3.74E-01 | ENSG00000196262      |
| ENSG00000150593  | <b>PDCD4</b>   | programmed cell death 4                                               | 0.05  | 8.46    | 3.90E-01 | ENSG00000092871      |
| ENSG00000143756  | FBXO28         | F-box protein 28                                                      | 0.04  | 5.30    | 3.91E-01 | ENSG00000131023      |
| ENSG00000182568  | <b>SATB1</b>   | SATB homeobox protein 1                                               | 0.09  | 7.64    | 4.06E-01 | ENSG00000144909      |
| ENSG00000119866  | <b>BCL11A</b>  | B-cell CLL/lymphoma 11A                                               | -0.35 | -0.92   | 4.47E-01 | ENSG00000066933      |
| ENSG00000173281  | <b>PPP1R3B</b> | protein phosphatase 1 regulatory subunit 3B                           | 0.09  | 3.82    | 4.58E-01 | ENSG00000118971      |
| ENSG00000171940  | <b>ZNF217</b>  | zinc finger protein 217                                               | 0.03  | 6.68    | 5.29E-01 | ENSG00000169564      |

|                 |                 |                   |       |      |          |
|-----------------|-----------------|-------------------|-------|------|----------|
| ENSG00000157933 | <b>SKI</b>      | SKI proto-onco    | 0.05  | 7.14 | 5.44E-01 |
| ENSG00000143878 | <b>RHOB</b>     | ras homolog fa    | -0.19 | 5.49 | 5.62E-01 |
| ENSG00000102908 | NFAT5           | nuclear factor c  | -0.03 | 5.84 | 5.65E-01 |
| ENSG00000163939 | <b>PBRM1</b>    | polybromo 1 [S    | -0.02 | 5.89 | 5.65E-01 |
| ENSG00000165572 | <b>KBTBD6</b>   | kelch repeat an   | -0.05 | 2.93 | 5.77E-01 |
| ENSG00000155744 | <b>FAM126B</b>  | family with seq   | 0.03  | 4.63 | 6.01E-01 |
| ENSG00000196937 | <b>FAM3C</b>    | family with seq   | 0.04  | 4.85 | 6.18E-01 |
| ENSG00000123124 | WWP1            | WW domain co      | 0.03  | 6.97 | 6.71E-01 |
| ENSG00000101972 | <b>STAG2</b>    | stromal antiger   | 0.01  | 6.93 | 6.78E-01 |
| ENSG00000204116 | CHIC1           | cysteine rich hy  | 0.02  | 5.46 | 6.97E-01 |
| ENSG00000095015 | <b>MAP3K1</b>   | mitogen-activa    | 0.03  | 8.20 | 7.24E-01 |
| ENSG00000112739 | PRPF4B          | pre-mRNA proc     | -0.01 | 7.52 | 7.66E-01 |
| ENSG00000157741 | UBN2            | ubinnuclein 2 [Sc | -0.02 | 5.00 | 7.75E-01 |
| ENSG00000113300 | <b>CNOT6</b>    | CCR4-NOT tran     | 0.02  | 5.64 | 7.85E-01 |
| ENSG00000128923 | <b>FAM63B</b>   | family with seq   | 0.02  | 4.99 | 8.39E-01 |
| ENSG00000105810 | CDK6            | cyclin depende    | 0.02  | 5.82 | 8.84E-01 |
| ENSG00000138081 | <b>FBXO11</b>   | F-box protein 1   | 0.00  | 6.64 | 8.93E-01 |
| ENSG00000178177 | LCORL           | ligand depende    | 0.01  | 2.93 | 9.10E-01 |
| ENSG00000148730 | <b>EIF4EBP2</b> | eukaryotic tran   | 0.00  | 7.12 | 9.40E-01 |
| ENSG00000103064 | SLC7A6          | solute carrier fa | 0.01  | 8.52 | 9.45E-01 |
| ENSG00000115020 | PIKFYVE         | phosphoinositic   | 0.00  | 6.42 | 9.73E-01 |
| ENSG00000145675 | PIK3R1          | phosphoinositic   | 0.00  | 7.40 | 9.80E-01 |
| ENSG00000123472 | ATPAF1          | ATP synthase n    | 0.00  | 5.17 | 9.89E-01 |
| ENSG00000172575 | <b>RASGRP1</b>  | RAS guanyl rele   | 0.00  | 8.41 | 9.99E-01 |

ENSG00000167548  
ENSG00000125538  
ENSG00000129128  
ENSG00000124209  
ENSG00000138336  
ENSG00000153187  
ENSG00000185246  
ENSG00000109458  
ENSG00000112159  
ENSG00000135046  
ENSG00000031691  
ENSG00000196227  
ENSG00000154518  
ENSG00000048649  
ENSG00000076641  
ENSG00000169967  
ENSG00000165244  
ENSG00000140299  
ENSG00000143614  
ENSG00000163624  
ENSG00000183508  
ENSG00000008277  
ENSG00000196591  
ENSG00000080546  
ENSG00000198855  
ENSG00000140575  
ENSG00000104343  
ENSG00000166225  
ENSG00000118263  
ENSG00000102218  
ENSG00000168807  
ENSG00000025796  
ENSG00000107036  
ENSG00000120696  
ENSG00000164916  
ENSG00000136045  
ENSG00000164039  
ENSG00000186687  
ENSG00000065613  
ENSG00000019995  
ENSG00000156735  
ENSG00000157106  
ENSG00000197147  
ENSG00000090104

ENSG00000165219  
ENSG00000164237  
ENSG00000198743  
ENSG00000174718  
ENSG00000120868  
ENSG00000101856  
ENSG00000155640  
ENSG00000151553  
ENSG00000174010  
ENSG00000153250  
ENSG00000145604  
ENSG00000111300  
ENSG00000100422  
ENSG00000134698  
ENSG00000164252  
ENSG00000079785  
ENSG00000135318  
ENSG00000116106  
ENSG00000125430  
ENSG00000119138  
ENSG00000165929  
ENSG00000110422  
ENSG00000118762  
ENSG00000182504  
ENSG00000084093  
ENSG00000156531  
ENSG00000132912  
ENSG00000197323  
ENSG00000052795  
ENSG00000211455  
ENSG00000101665  
ENSG00000103769  
ENSG00000141034  
ENSG00000172915  
ENSG00000106780  
ENSG00000156052  
ENSG00000095139  
ENSG00000145916  
ENSG00000106692  
ENSG00000188647  
ENSG00000101126  
ENSG00000165102  
ENSG00000197111  
ENSG00000136986

ENSG00000101367  
ENSG00000183808  
ENSG00000138430  
ENSG00000136381  
ENSG00000115183  
ENSG0000013503  
ENSG00000100030  
ENSG00000066117  
ENSG00000155850  
ENSG00000129636  
ENSG00000165943  
ENSG00000135452  
ENSG00000256223  
ENSG00000120708  
ENSG00000177189  
ENSG00000156875  
ENSG00000112394  
ENSG00000144959  
ENSG00000177200  
ENSG00000177932  
ENSG00000134318  
ENSG00000180530  
ENSG00000100916  
ENSG00000130396  
ENSG00000181690  
ENSG00000170860  
ENSG00000197329  
ENSG00000101752  
ENSG00000162378  
ENSG00000099942  
ENSG00000087448  
ENSG00000153944  
ENSG00000110047  
ENSG00000204217  
ENSG00000154114  
ENSG00000086200  
ENSG00000074603  
ENSG00000106415  
ENSG00000160199  
ENSG00000072501  
ENSG00000060339  
ENSG00000157500  
ENSG00000171365  
ENSG00000143575

ENSG00000116954  
ENSG00000185009  
ENSG00000041353  
ENSG00000107864  
ENSG00000075239  
ENSG00000068305  
ENSG00000186432  
ENSG00000163069  
ENSG00000154305  
ENSG00000087470  
ENSG00000150593  
ENSG00000152642  
ENSG00000170500  
ENSG00000141367  
ENSG00000152944  
ENSG00000020577  
ENSG00000138600  
ENSG00000182568  
ENSG00000141759  
ENSG00000058063  
ENSG00000127870  
ENSG00000140525  
ENSG00000178691  
ENSG00000007168  
ENSG00000165650  
ENSG00000197969  
ENSG00000142599  
ENSG00000146281  
ENSG00000058056  
ENSG00000163513  
ENSG00000132463  
ENSG00000118816  
ENSG00000158604  
ENSG00000180011  
ENSG00000119866  
ENSG00000196914  
ENSG00000148158  
ENSG00000060749  
ENSG00000173281  
ENSG00000108021  
ENSG00000132842  
ENSG00000168610  
ENSG00000165105  
ENSG00000117560



ENSG00000115310  
ENSG00000033178  
ENSG00000113328  
ENSG00000101384  
ENSG00000071967  
ENSG00000083168  
ENSG00000090863  
ENSG00000111328  
ENSG00000198142  
ENSG00000109654  
ENSG00000112242  
ENSG00000159388  
ENSG00000138443  
ENSG00000169905  
ENSG00000171940  
ENSG00000099940  
ENSG00000116918  
ENSG00000198961  
ENSG00000157933  
ENSG00000104866  
ENSG00000077684  
ENSG00000143878  
ENSG00000111266  
ENSG00000135521  
ENSG00000184743  
ENSG00000163939  
ENSG00000151413  
ENSG00000163125  
ENSG00000140396  
ENSG00000165572  
ENSG00000184007  
ENSG00000172175  
ENSG00000115159  
ENSG00000112697  
ENSG00000083312  
ENSG00000166483  
ENSG00000070759  
ENSG00000153914  
ENSG00000120137  
ENSG00000102401  
ENSG00000173674  
ENSG00000257923  
ENSG00000155744  
ENSG00000123836

ENSG00000112941  
ENSG00000148154  
ENSG00000155189  
ENSG00000215301  
ENSG00000196937  
ENSG00000162909  
ENSG00000170348  
ENSG00000177311  
ENSG00000039319  
ENSG00000188215  
ENSG00000144674  
ENSG00000177051  
ENSG00000105856  
ENSG00000117868  
ENSG00000145332  
ENSG00000107771  
ENSG00000112425  
ENSG00000120805  
ENSG00000184602  
ENSG00000130449  
ENSG00000175582  
ENSG00000076706  
ENSG00000118579  
ENSG00000091009  
ENSG00000153561  
ENSG00000155096  
ENSG00000120889  
ENSG00000101972  
ENSG00000100485  
ENSG00000135655  
ENSG00000185129  
ENSG00000148143  
ENSG00000183735  
ENSG00000122707  
ENSG00000122566  
ENSG00000113368  
ENSG00000107560  
ENSG00000130638  
ENSG00000095015  
ENSG00000171150  
ENSG00000125633  
ENSG00000029993  
ENSG00000115808  
ENSG00000149792

ENSG00000160213  
ENSG00000100811  
ENSG00000100345  
ENSG00000099194  
ENSG00000102144  
ENSG00000163602  
ENSG00000113300  
ENSG00000107099  
ENSG00000136100  
ENSG00000026508  
ENSG00000170677  
ENSG00000120709  
ENSG00000138663  
ENSG00000101266  
ENSG00000145495  
ENSG00000156642  
ENSG00000198642  
ENSG00000140443  
ENSG00000075420  
ENSG00000067955  
ENSG00000136868  
ENSG00000196268  
ENSG00000197312  
ENSG00000001631  
ENSG00000170802  
ENSG00000116199  
ENSG00000108510  
ENSG00000163848  
ENSG00000106723  
ENSG00000144445  
ENSG00000128923  
ENSG00000175130  
ENSG00000094916  
ENSG00000183044  
ENSG00000013375  
ENSG00000074201  
ENSG00000169398  
ENSG00000108256  
ENSG00000163283  
ENSG00000132294  
ENSG00000138069  
ENSG00000065183  
ENSG00000148835  
ENSG00000119669

ENSG00000135535  
ENSG00000105887  
ENSG00000131791  
ENSG00000056586  
ENSG00000057757  
ENSG00000113387  
ENSG00000048544  
ENSG00000138081  
ENSG00000112902  
ENSG00000083099  
ENSG00000122335  
ENSG00000155962  
ENSG00000162607  
ENSG00000170242  
ENSG00000102554  
ENSG00000142634  
ENSG00000148730  
ENSG00000166681  
ENSG00000111647  
ENSG00000085788  
ENSG00000147548  
ENSG00000070882  
ENSG00000059728  
ENSG00000100647  
ENSG00000123684  
ENSG00000161813  
ENSG00000114098  
ENSG00000177125  
ENSG00000011405  
ENSG00000123091  
ENSG00000018189  
ENSG00000134198  
ENSG00000172575  
ENSG00000159399  
ENSG00000013588  
ENSG00000064042  
ENSG00000078399  
ENSG00000079308  
ENSG00000092969  
ENSG00000102221  
ENSG00000104369  
ENSG00000111799  
ENSG00000113594  
ENSG00000114757

ENSG00000115844  
ENSG00000116132  
ENSG00000118946  
ENSG00000122420  
ENSG00000122778  
ENSG00000122786  
ENSG00000125398  
ENSG00000135116  
ENSG00000135378  
ENSG00000135862  
ENSG00000136634  
ENSG00000138639  
ENSG00000143867  
ENSG00000151090  
ENSG00000152078  
ENSG00000153904  
ENSG00000154380  
ENSG00000159217  
ENSG00000162407  
ENSG00000162409  
ENSG00000163293  
ENSG00000163637  
ENSG00000164176  
ENSG00000164761  
ENSG00000165092  
ENSG00000166444  
ENSG00000169245  
ENSG00000171714  
ENSG00000172380  
ENSG00000173391  
ENSG00000176597  
ENSG00000180592  
ENSG00000181449  
ENSG00000182752  
ENSG00000186205  
ENSG00000203727  
ENSG00000206075  
ENSG00000214736  
ENSG00000222014  
ENSG00000263001  
ENSG00000272602

een RR-MS and HC. Genes identified as miR-21 targets

7 TarBase7.0 were selected for investigation.

| Gene Name     | Description      | logFC | AveExpr | P.Value  |
|---------------|------------------|-------|---------|----------|
| GRPEL2        | GrpE like 2, mi  | 0.44  | 5.87    | 6.63E-05 |
| <b>YOD1</b>   | YOD1 deubiqu     | 0.30  | 5.09    | 3.28E-04 |
| ARRDC3        | arrestin domai   | 0.44  | 8.17    | 7.68E-04 |
| DEGS1         | delta 4-desatu   | 0.21  | 6.40    | 2.74E-03 |
| LRRC57        | leucine rich re  | 0.33  | 5.02    | 4.09E-03 |
| CCT5          | chaperonin co    | -0.17 | 6.06    | 4.97E-03 |
| ATXN7L3B      | ataxin 7 like 3E | 0.17  | 8.07    | 5.66E-03 |
| RBSN          | rabenosyn, RA    | 0.13  | 5.61    | 7.10E-03 |
| CBX4          | chromobox 4 [    | 0.22  | 6.52    | 9.03E-03 |
| <b>PURB</b>   | purine rich ele  | 0.17  | 5.75    | 9.29E-03 |
| AFTPH         | aftiphilin [Sour | -0.14 | 6.05    | 1.24E-02 |
| ELOVL4        | ELOVL fatty ac   | 0.61  | 2.44    | 1.48E-02 |
| SFXN1         | sideroflexin 1   | 0.14  | 6.23    | 1.49E-02 |
| PTPN13        | protein tyrosin  | 0.67  | 3.10    | 1.55E-02 |
| MTMR9         | myotubularin i   | 0.09  | 4.85    | 1.65E-02 |
| G3BP1         | G3BP stress gr   | 0.09  | 6.92    | 1.88E-02 |
| CD47          | CD47 molecule    | 0.09  | 8.47    | 1.95E-02 |
| <b>BCL7A</b>  | BCL tumor sup    | 0.63  | 2.13    | 2.20E-02 |
| SLC44A1       | solute carrier f | -0.13 | 3.78    | 2.27E-02 |
| ADGRG2        | adhesion G pro   | -1.00 | -1.29   | 2.30E-02 |
| KLF3          | Kruppel like fa  | 0.17  | 7.88    | 2.33E-02 |
| ATAD2B        | ATPase family,   | -0.12 | 4.38    | 2.36E-02 |
| BRWD1         | bromodomain      | 0.10  | 6.29    | 2.41E-02 |
| PTPDC1        | protein tyrosin  | -0.19 | 3.27    | 2.52E-02 |
| FKBP5         | FK506 binding    | 0.31  | 6.88    | 2.56E-02 |
| SLC17A5       | solute carrier f | 0.14  | 4.31    | 2.74E-02 |
| TRAPPC2       | trafficking prot | 0.11  | 5.06    | 3.06E-02 |
| EIF5          | eukaryotic tra   | 0.13  | 7.55    | 3.10E-02 |
| LMO4          | LIM domain or    | 0.33  | 4.30    | 3.20E-02 |
| NIPBL         | NIPBL, cohesin   | -0.07 | 6.49    | 3.25E-02 |
| SNX29         | sorting nexin 2  | 0.12  | 4.84    | 3.29E-02 |
| <b>TOPORS</b> | TOP1 binding a   | 0.12  | 5.20    | 3.33E-02 |
| YEATS4        | YEATS domain     | -0.25 | 5.66    | 3.42E-02 |
| PPIA          | peptidylprolyl   | 0.11  | 8.48    | 3.71E-02 |
| RFFL          | ring finger and  | 0.11  | 5.60    | 3.76E-02 |
| <b>LATS1</b>  | large tumor su   | -0.07 | 5.87    | 3.88E-02 |
| OSBPL11       | oxysterol bindi  | -0.17 | 4.79    | 4.23E-02 |
| MYO9A         | myosin IXA [Sc   | -0.09 | 4.35    | 4.30E-02 |
| CCND2         | cyclin D2 [Sour  | 0.13  | 7.23    | 4.31E-02 |
| PCBP1         | poly(rC) bindin  | -0.14 | 9.08    | 4.32E-02 |

|               |                  |       |       |          |
|---------------|------------------|-------|-------|----------|
| KMT2D         | lysine methyltr  | -0.08 | 6.96  | 4.38E-02 |
| IL1B          | interleukin 1 b  | -1.38 | 0.88  | 4.39E-02 |
| SPCS3         | signal peptidas  | 0.10  | 7.47  | 4.41E-02 |
| <b>RAB22A</b> | RAB22A, mem      | 0.11  | 4.57  | 4.50E-02 |
| <b>TET1</b>   | tet methylcyto   | -0.26 | 1.57  | 4.81E-02 |
| HNRNPU        | heterogeneou     | -0.10 | 8.12  | 4.94E-02 |
| PRPF39        | pre-mRNA pro     | -0.08 | 6.85  | 5.31E-02 |
| GAB1          | GRB2 associat    | -0.83 | -1.43 | 5.55E-02 |
| MDN1          | midasin AAA A    | -0.12 | 6.59  | 5.75E-02 |
| ANXA1         | annexin A1 [Sc   | -0.29 | 8.85  | 5.78E-02 |
| CENPQ         | centromere pr    | -0.25 | 3.52  | 6.30E-02 |
| FAM217B       | family with sec  | 0.12  | 5.04  | 6.53E-02 |
| ATP5G3        | ATP synthase,    | 0.10  | 4.69  | 6.92E-02 |
| RSF1          | remodeling an    | 0.07  | 5.37  | 6.93E-02 |
| <b>PAG1</b>   | phosphoprotei    | 0.18  | 8.28  | 7.03E-02 |
| MAP3K2        | mitogen-activ    | 0.06  | 6.44  | 7.07E-02 |
| <b>ZNF367</b> | zinc finger pro  | 0.16  | 3.85  | 7.29E-02 |
| BNIP2         | BCL2 interactir  | 0.07  | 6.14  | 7.31E-02 |
| GATAD2B       | GATA zinc fing   | 0.06  | 6.47  | 7.94E-02 |
| CDS1          | CDP-diacylglyc   | -0.27 | 0.83  | 8.08E-02 |
| FAM46C        | family with sec  | -0.44 | 6.75  | 8.49E-02 |
| ADAM22        | ADAM metallo     | -0.23 | 1.73  | 8.58E-02 |
| HDAC2         | histone deacet   | -0.13 | 4.32  | 8.59E-02 |
| SESN1         | sestrin 1 [Sour  | 0.25  | 6.65  | 8.70E-02 |
| FICD          | FIC domain coi   | 0.21  | 2.08  | 9.01E-02 |
| IQGAP1        | IQ motif conta   | -0.13 | 6.82  | 9.03E-02 |
| UBE2W         | ubiquitin conju  | 0.08  | 4.35  | 9.23E-02 |
| <b>FRS2</b>   | fibroblast grov  | 0.08  | 4.97  | 9.50E-02 |
| KLF7          | Kruppel like fa  | 0.16  | 6.27  | 9.58E-02 |
| RP2           | retinitis pigme  | -0.15 | 3.81  | 9.83E-02 |
| SNTB2         | syntrophin bet   | 0.19  | 4.62  | 1.03E-01 |
| SEC63         | SEC63 homolo     | 0.06  | 5.69  | 1.03E-01 |
| RIC1          | RIC1 homolog,    | 0.07  | 5.43  | 1.04E-01 |
| KBTBD7        | kelch repeat ai  | 0.29  | 2.02  | 1.08E-01 |
| FOXK1         | forkhead box k   | 0.12  | 5.91  | 1.13E-01 |
| PWP1          | PWP1 homolo      | -0.07 | 6.17  | 1.14E-01 |
| BDH2          | 3-hydroxybuty    | 0.17  | 4.17  | 1.16E-01 |
| LYRM7         | LYR motif cont   | -0.10 | 5.42  | 1.17E-01 |
| SLK           | STE20 like kina  | -0.08 | 6.04  | 1.24E-01 |
| ZRANB1        | zinc finger RAN  | 0.06  | 5.57  | 1.25E-01 |
| BAG4          | BCL2 associate   | 0.11  | 4.01  | 1.27E-01 |
| SMG1          | SMG1, nonsen     | -0.08 | 7.37  | 1.36E-01 |
| LRRC8B        | leucine rich rej | 0.14  | 4.83  | 1.36E-01 |
| RGS1          | regulator of G-  | -0.45 | 8.05  | 1.37E-01 |

|               |                   |       |      |          |
|---------------|-------------------|-------|------|----------|
| GAPVD1        | GTPase activat    | 0.07  | 5.09 | 1.37E-01 |
| CMBL          | carboxymethy      | -0.37 | 0.54 | 1.40E-01 |
| SLC5A3        | solute carrier f  | -0.16 | 5.06 | 1.40E-01 |
| KIAA1551      | KIAA1551 [Sou     | -0.13 | 8.85 | 1.40E-01 |
| APAF1         | apoptotic pept    | -0.08 | 5.15 | 1.43E-01 |
| PGRMC1        | progesterone i    | 0.08  | 5.17 | 1.45E-01 |
| -             | -                 | 0.16  | 4.26 | 1.46E-01 |
| FAM160B1      | family with sec   | 0.18  | 5.76 | 1.46E-01 |
| <b>KLHL15</b> | kelch like fami   | 0.12  | 4.55 | 1.48E-01 |
| RBMS1         | RNA binding nr    | 0.10  | 6.79 | 1.48E-01 |
| SKP2          | S-phase kinase    | -0.12 | 4.79 | 1.55E-01 |
| NAA25         | N(alpha)-acety    | 0.08  | 5.08 | 1.58E-01 |
| CERK          | ceramide kina:    | 0.09  | 7.87 | 1.59E-01 |
| <b>AGO4</b>   | argonaute 4, R    | 0.17  | 5.75 | 1.65E-01 |
| AGGF1         | angiogenic fac    | -0.06 | 5.64 | 1.65E-01 |
| DDX1          | DEAD/H-box h      | -0.06 | 6.10 | 1.66E-01 |
| NT5E          | 5'-nucleotidas    | -0.43 | 2.73 | 1.71E-01 |
| EPHA4         | EPH receptor /    | 0.24  | 5.25 | 1.74E-01 |
| HS3ST3B1      | heparan sulfat    | 0.11  | 5.43 | 1.76E-01 |
| KLF9          | Kruppel like fa   | 0.18  | 7.60 | 1.81E-01 |
| TC2N          | tandem C2 doi     | -0.11 | 8.46 | 1.82E-01 |
| HIPK3         | homeodomain       | -0.08 | 6.58 | 1.84E-01 |
| PKD2          | polycystin 2, tr  | 0.18  | 4.94 | 1.86E-01 |
| CEP97         | centrosomal p     | 0.07  | 4.48 | 1.90E-01 |
| REST          | RE1 silencing t   | 0.05  | 6.04 | 1.92E-01 |
| PHF6          | PHD finger pro    | -0.07 | 4.94 | 1.93E-01 |
| DCTN4         | dynactin subu     | 0.06  | 5.33 | 1.95E-01 |
| <b>TRIM33</b> | tripartite moti   | 0.04  | 6.56 | 1.95E-01 |
| FNIP2         | folliculin intera | -0.07 | 3.32 | 1.97E-01 |
| STK38L        | serine/threoni    | -0.06 | 4.69 | 1.99E-01 |
| SMAD7         | SMAD family n     | -0.28 | 4.63 | 2.08E-01 |
| RAB11A        | RAB11A, mem       | -0.05 | 5.76 | 2.12E-01 |
| GID4          | GID complex s     | -0.14 | 4.12 | 2.13E-01 |
| NBEA          | neurobeachin      | 0.23  | 2.11 | 2.16E-01 |
| MEGF9         | multiple EGF li   | 0.11  | 5.54 | 2.18E-01 |
| GNAQ          | G protein subu    | 0.05  | 6.60 | 2.18E-01 |
| ARCN1         | archain 1 [Sou    | -0.08 | 7.02 | 2.20E-01 |
| RMND5B        | required for m    | -0.06 | 4.33 | 2.22E-01 |
| FKTN          | fukutin [Sourc    | 0.08  | 5.14 | 2.26E-01 |
| PTAR1         | protein prenyl    | 0.05  | 6.78 | 2.32E-01 |
| ADNP          | activity dependen | 0.05  | 6.66 | 2.35E-01 |
| HGSNAT        | heparan-alpha     | 0.07  | 5.52 | 2.38E-01 |
| PCBP2         | poly(rC) bindin   | 0.05  | 6.83 | 2.43E-01 |
| DERL1         | derlin 1 [Sourc   | -0.07 | 5.60 | 2.47E-01 |



|                |                  |       |       |          |
|----------------|------------------|-------|-------|----------|
| MAPRE1         | microtubule as   | -0.05 | 7.41  | 2.50E-01 |
| RBM12B         | RNA binding r    | -0.08 | 4.97  | 2.53E-01 |
| OLA1           | Obg-like ATPa    | 0.06  | 5.00  | 2.54E-01 |
| IREB2          | iron responsiv   | 0.05  | 5.96  | 2.57E-01 |
| TANC1          | tetratricopepti  | 0.29  | -0.39 | 2.57E-01 |
| POLR3B         | RNA polymera     | -0.10 | 3.60  | 2.61E-01 |
| MAPK1          | mitogen-activa   | -0.06 | 6.48  | 2.62E-01 |
| SMARCD1        | SWI/SNF relat    | 0.04  | 6.43  | 2.66E-01 |
| SLC26A2        | solute carrier f | 0.05  | 4.32  | 2.67E-01 |
| ITFG1          | integrin alpha   | 0.06  | 3.57  | 2.67E-01 |
| MOAP1          | modulator of a   | 0.09  | 7.87  | 2.68E-01 |
| TSPAN31        | tetraspanin 31   | -0.10 | 4.22  | 2.70E-01 |
| ZNF10          | zinc finger pro  | -0.07 | 4.06  | 2.71E-01 |
| TGFBI          | transforming g   | -0.33 | 1.53  | 2.73E-01 |
| <b>RPS6KA3</b> | ribosomal prot   | 0.06  | 7.43  | 2.83E-01 |
| MFSD14A        | major facilitat  | 0.05  | 6.70  | 2.84E-01 |
| SLC16A10       | solute carrier f | 0.16  | 4.08  | 2.86E-01 |
| NCEH1          | neutral choles   | -0.14 | 2.41  | 2.91E-01 |
| CHD9           | chromodomai      | 0.08  | 4.59  | 2.92E-01 |
| ZNF354C        | zinc finger pro  | 0.06  | 4.99  | 2.95E-01 |
| ROCK2          | Rho associatec   | -0.05 | 4.86  | 2.95E-01 |
| NRIP1          | nuclear recept   | 0.08  | 5.14  | 2.97E-01 |
| BRMS1L         | breast cancer i  | -0.07 | 3.53  | 2.98E-01 |
| AFDN           | afadin, adhere   | 0.24  | 3.44  | 2.99E-01 |
| <b>PLAG1</b>   | PLAG1 zinc fin   | 0.14  | 4.53  | 2.99E-01 |
| LSM3           | LSM3 homolog     | 0.07  | 5.10  | 3.00E-01 |
| PELI1          | pellino E3 ubi   | 0.11  | 7.00  | 3.02E-01 |
| MIB1           | mindbomb E3      | 0.07  | 5.54  | 3.04E-01 |
| <b>ZYG11B</b>  | zyg-11 family r  | 0.05  | 5.21  | 3.05E-01 |
| CRKL           | CRK like proto   | -0.07 | 6.49  | 3.07E-01 |
| KLHL42         | kelch like fami  | -0.08 | 5.27  | 3.10E-01 |
| MSI2           | musashi RNA k    | 0.05  | 5.89  | 3.17E-01 |
| EHD1           | EH domain cor    | -0.07 | 6.61  | 3.19E-01 |
| <b>BMPR2</b>   | bone morphog     | 0.06  | 4.33  | 3.20E-01 |
| TBCEL          | tubulin folding  | 0.07  | 4.51  | 3.23E-01 |
| IPO11          | importin 11 [S   | 0.05  | 3.32  | 3.26E-01 |
| DPP8           | dipeptidyl pep   | 0.03  | 5.74  | 3.29E-01 |
| GLCC1          | glucocorticoid   | 0.08  | 5.73  | 3.32E-01 |
| PKNOX1         | PBX/knotted 1    | -0.05 | 3.79  | 3.37E-01 |
| SMC1A          | structural mair  | -0.10 | 6.25  | 3.37E-01 |
| CCAR1          | cell division cy | 0.04  | 7.30  | 3.45E-01 |
| APPL1          | adaptor protei   | -0.04 | 5.21  | 3.54E-01 |
| CLCN5          | chloride voltag  | -0.10 | 1.88  | 3.60E-01 |
| HAX1           | HCLS1 associat   | -0.06 | 6.87  | 3.63E-01 |

|                |                  |       |       |          |
|----------------|------------------|-------|-------|----------|
| RRAGC          | Ras related GT   | -0.07 | 4.65  | 3.65E-01 |
| <b>AP3M1</b>   | adaptor relate   | -0.04 | 5.67  | 3.68E-01 |
| RAB27B         | RAB27B, mem      | 0.17  | 2.88  | 3.69E-01 |
| <b>CPEB3</b>   | cytoplasmic pc   | 0.07  | 2.84  | 3.74E-01 |
| ACAT1          | acetyl-CoA ace   | -0.08 | 3.93  | 3.75E-01 |
| MEF2A          | myocyte enha     | 0.06  | 5.71  | 3.79E-01 |
| KPNA4          | karyopherin su   | -0.04 | 5.45  | 3.82E-01 |
| SGCB           | sarcoglycan be   | -0.08 | 3.39  | 3.83E-01 |
| MIA3           | MIA family me    | -0.04 | 5.87  | 3.85E-01 |
| DNM1L          | dynamamin 1 like | 0.03  | 5.96  | 3.90E-01 |
| <b>PDCD4</b>   | programmed c     | 0.05  | 8.46  | 3.90E-01 |
| GPD1L          | glycerol-3-pho   | -0.07 | 5.84  | 3.95E-01 |
| LONRF2         | LON peptidase    | -0.28 | -0.67 | 3.97E-01 |
| CLTC           | clathrin heavy   | -0.03 | 5.84  | 3.98E-01 |
| MED21          | mediator comj    | 0.06  | 5.65  | 3.99E-01 |
| SAMD4A         | sterile alpha m  | -0.20 | -0.19 | 4.00E-01 |
| SPPL2A         | signal peptide   | 0.06  | 5.57  | 4.02E-01 |
| <b>SATB1</b>   | SATB homeobr     | 0.09  | 7.64  | 4.06E-01 |
| TXNL4A         | thioredoxin lik  | 0.05  | 5.67  | 4.08E-01 |
| ATP11B         | ATPase phospl    | -0.03 | 7.06  | 4.10E-01 |
| RNF6           | ring finger pro  | 0.04  | 5.79  | 4.12E-01 |
| FANCI          | Fanconi anemi    | -0.07 | 3.36  | 4.16E-01 |
| SUZ12          | SUZ12 polycon    | -0.04 | 6.13  | 4.19E-01 |
| PAFAH1B1       | platelet activa  | 0.03  | 7.22  | 4.20E-01 |
| PDZD8          | PDZ domain cc    | -0.08 | 5.11  | 4.24E-01 |
| VPS13A         | vacuolar prote   | -0.05 | 6.20  | 4.26E-01 |
| RERE           | arginine-glutar  | 0.05  | 6.56  | 4.32E-01 |
| PM20D2         | peptidase M2C    | -0.04 | 5.20  | 4.33E-01 |
| USP13          | ubiquitin speci  | -0.06 | 3.82  | 4.35E-01 |
| TGFBR2         | transforming g   | 0.06  | 8.68  | 4.35E-01 |
| GRSF1          | G-rich RNA sec   | 0.04  | 5.80  | 4.36E-01 |
| CCNI           | cyclin I [Source | 0.04  | 9.14  | 4.37E-01 |
| TMED4          | transmembrar     | 0.03  | 7.80  | 4.37E-01 |
| ZADH2          | zinc binding al  | 0.06  | 5.30  | 4.37E-01 |
| <b>BCL11A</b>  | B-cell CLL/lymj  | -0.35 | -0.92 | 4.47E-01 |
| ARHGEF12       | Rho guanine n    | 0.17  | 2.66  | 4.49E-01 |
| SNX30          | sorting nexin f  | -0.06 | 4.81  | 4.50E-01 |
| QSER1          | glutamine and    | 0.05  | 4.39  | 4.53E-01 |
| <b>PPP1R3B</b> | protein phospl   | 0.09  | 3.82  | 4.58E-01 |
| FAM208B        | family with sec  | -0.03 | 6.22  | 4.69E-01 |
| AP3B1          | adaptor relate   | -0.04 | 4.91  | 4.71E-01 |
| STAT3          | signal transduc  | -0.03 | 6.67  | 4.79E-01 |
| RASEF          | RAS and EF-ha    | -0.21 | 0.50  | 4.80E-01 |
| FASLG          | Fas ligand [Sou  | -0.26 | 1.02  | 4.81E-01 |

|                |                   |       |       |          |
|----------------|-------------------|-------|-------|----------|
| RTN4           | reticulon 4 [So   | 0.04  | 6.20  | 4.90E-01 |
| UBA6           | ubiquitin like r  | -0.03 | 5.57  | 4.93E-01 |
| CCNG1          | cyclin G1 [Sou    | -0.03 | 7.42  | 4.98E-01 |
| JAG1           | jagged 1 [Sour    | -0.33 | -0.72 | 4.99E-01 |
| CYBRD1         | cytochrome b      | -0.25 | -0.14 | 5.01E-01 |
| KAT6A          | lysine acetyltra  | -0.02 | 7.15  | 5.07E-01 |
| GLG1           | golgi glycoprot   | 0.02  | 7.47  | 5.11E-01 |
| CDK2AP1        | cyclin depende    | 0.15  | 1.66  | 5.14E-01 |
| SOWAHC         | sosondowah a      | 0.18  | 1.61  | 5.16E-01 |
| TRIM2          | tripartite moti   | 0.11  | 2.37  | 5.19E-01 |
| E2F3           | E2F transcripti   | 0.05  | 5.22  | 5.21E-01 |
| BTG2           | BTG anti-prolif   | -0.07 | 10.18 | 5.21E-01 |
| ABI2           | abl interactor    | -0.04 | 5.52  | 5.24E-01 |
| TOR1AIP2       | torsin 1A inter   | 0.03  | 3.96  | 5.28E-01 |
| <b>ZNF217</b>  | zinc finger pro   | 0.03  | 6.68  | 5.29E-01 |
| SNAP29         | synaptosome a     | -0.04 | 5.41  | 5.35E-01 |
| TSNAX          | translin associ   | 0.02  | 5.44  | 5.36E-01 |
| PJA2           | praja ring fing   | 0.03  | 6.98  | 5.41E-01 |
| <b>SKI</b>     | SKI proto-oncc    | 0.05  | 7.14  | 5.44E-01 |
| PPP1R37        | protein phospl    | -0.04 | 3.62  | 5.53E-01 |
| JADE1          | jade family PH    | -0.03 | 5.90  | 5.60E-01 |
| <b>RHOB</b>    | ras homolog fa    | -0.19 | 5.49  | 5.62E-01 |
| DUSP16         | dual specificity  | 0.06  | 6.63  | 5.64E-01 |
| LTV1           | LTV1 ribosome     | 0.03  | 6.53  | 5.65E-01 |
| ATL3           | atlastin GTPase   | 0.03  | 5.11  | 5.65E-01 |
| <b>PBRM1</b>   | polybromo 1 [     | -0.02 | 5.89  | 5.65E-01 |
| NUBPL          | nucleotide bin    | 0.04  | 2.87  | 5.70E-01 |
| RPRD2          | regulation of n   | -0.02 | 6.12  | 5.70E-01 |
| NCOA2          | nuclear recept    | 0.03  | 5.86  | 5.75E-01 |
| <b>KBTBD6</b>  | kelch repeat ar   | -0.05 | 2.93  | 5.77E-01 |
| PTP4A2         | protein tyrosir   | 0.03  | 8.12  | 5.77E-01 |
| MALT1          | MALT1 paraca      | -0.02 | 7.30  | 5.77E-01 |
| GPD2           | glycerol-3-pho    | 0.04  | 4.12  | 5.83E-01 |
| TMEM30A        | transmembrar      | 0.02  | 7.15  | 5.85E-01 |
| TNPO1          | transportin 1 [   | -0.02 | 6.04  | 5.86E-01 |
| WEE1           | WEE1 G2 chec      | -0.09 | 2.26  | 5.90E-01 |
| TESK2          | testis-specific l | 0.05  | 3.95  | 5.91E-01 |
| SREK1          | splicing regula   | 0.02  | 6.57  | 5.92E-01 |
| PANK3          | pantothenate      | 0.02  | 6.15  | 5.95E-01 |
| ARMCX3         | armadillo repe    | -0.03 | 5.47  | 5.96E-01 |
| EIF1AX         | eukaryotic trar   | -0.08 | 6.96  | 5.99E-01 |
| CUX1           | cut like homec    | 0.03  | 4.27  | 5.99E-01 |
| <b>FAM126B</b> | family with sec   | 0.03  | 4.63  | 6.01E-01 |
| PFKFB2         | 6-phosphofruc     | -0.07 | 1.95  | 6.02E-01 |

|               |                  |       |       |          |
|---------------|------------------|-------|-------|----------|
| PAPD7         | poly(A) RNA po   | 0.03  | 6.88  | 6.06E-01 |
| UGCG          | UDP-glucose c    | 0.05  | 6.21  | 6.09E-01 |
| AGPAT5        | 1-acylglycerol-  | 0.03  | 4.39  | 6.14E-01 |
| DDX3X         | DEAD-box heli    | -0.07 | 9.08  | 6.16E-01 |
| <b>FAM3C</b>  | family with sec  | 0.04  | 4.85  | 6.18E-01 |
| CAPN2         | calpain 2 [Sou   | -0.04 | 7.66  | 6.19E-01 |
| TMED10        | transmembrar     | -0.03 | 7.44  | 6.22E-01 |
| ZBTB38        | zinc finger and  | -0.05 | 5.16  | 6.25E-01 |
| ZFYVE16       | zinc finger FYV  | -0.02 | 4.16  | 6.28E-01 |
| DCUN1D3       | defective in cu  | -0.04 | 3.16  | 6.29E-01 |
| GOLGA4        | golgin A4 [Sou   | 0.03  | 5.91  | 6.32E-01 |
| FBXO46        | F-box protein 4  | -0.05 | 5.26  | 6.35E-01 |
| HBP1          | HMG-box tran     | 0.03  | 6.72  | 6.41E-01 |
| ESYT2         | extended syna    | 0.03  | 8.09  | 6.42E-01 |
| KLHL8         | kelch like fami  | -0.03 | 4.04  | 6.50E-01 |
| CCSER2        | coiled-coil seri | 0.04  | 6.74  | 6.53E-01 |
| EPM2A         | epilepsy, progr  | 0.05  | 3.67  | 6.56E-01 |
| ARL1          | ADP ribosylatic  | 0.02  | 5.09  | 6.59E-01 |
| SNN           | stannin [Sourc   | 0.06  | 6.03  | 6.63E-01 |
| ZSWIM6        | zinc finger SWI  | 0.03  | 5.09  | 6.64E-01 |
| RAB6A         | RAB6A, memb      | -0.02 | 6.18  | 6.65E-01 |
| MCAM          | melanoma cell    | -0.13 | 0.02  | 6.66E-01 |
| MED28         | mediator com     | -0.02 | 6.64  | 6.66E-01 |
| RBM27         | RNA binding r    | -0.02 | 5.91  | 6.67E-01 |
| RMND5A        | required for m   | 0.02  | 5.69  | 6.75E-01 |
| AZIN1         | antizyme inhib   | 0.02  | 6.37  | 6.76E-01 |
| TNFRSF10B     | TNF receptor s   | -0.03 | 6.27  | 6.77E-01 |
| <b>STAG2</b>  | stromal antige   | 0.01  | 6.93  | 6.78E-01 |
| SOS2          | SOS Ras/Rho g    | 0.02  | 5.66  | 6.79E-01 |
| USP15         | ubiquitin speci  | 0.02  | 7.12  | 6.87E-01 |
| PURA          | purine rich ele  | -0.03 | 5.03  | 6.99E-01 |
| ZNF462        | zinc finger pro  | 0.16  | -0.06 | 7.08E-01 |
| TBK1          | TANK binding l   | -0.05 | 4.73  | 7.11E-01 |
| RECK          | reversion indu   | -0.02 | 4.99  | 7.16E-01 |
| HNRNPA2B1     | heterogeneou:    | 0.01  | 9.69  | 7.17E-01 |
| LMNB1         | lamin B1 [Sour   | 0.03  | 5.03  | 7.17E-01 |
| RAB11FIP2     | RAB11 family i   | 0.02  | 5.72  | 7.17E-01 |
| ATXN10        | ataxin 10 [Sou   | 0.02  | 5.80  | 7.22E-01 |
| <b>MAP3K1</b> | mitogen-activa   | 0.03  | 8.20  | 7.24E-01 |
| SOCS5         | suppressor of c  | -0.02 | 4.54  | 7.31E-01 |
| CCDC93        | coiled-coil don  | 0.01  | 6.25  | 7.34E-01 |
| HMGGB3        | high mobility g  | 0.11  | 0.70  | 7.37E-01 |
| STRN          | striatin [Sourc  | 0.01  | 5.74  | 7.54E-01 |
| MRPL49        | mitochondrial    | 0.02  | 5.86  | 7.57E-01 |

|               |                  |       |      |          |
|---------------|------------------|-------|------|----------|
| CSTB          | cystatin B [Sou  | 0.03  | 5.96 | 7.57E-01 |
| YY1           | YY1 transcripti  | 0.01  | 7.09 | 7.59E-01 |
| MYH9          | myosin heavy     | -0.02 | 9.63 | 7.59E-01 |
| SCD           | stearoyl-CoA d   | 0.11  | 1.11 | 7.69E-01 |
| PGK1          | phosphoglycer    | 0.01  | 7.52 | 7.74E-01 |
| RYBP          | RING1 and YY1    | -0.02 | 5.95 | 7.81E-01 |
| <b>CNOT6</b>  | CCR4-NOT trar    | 0.02  | 5.64 | 7.85E-01 |
| DOCK8         | dedicator of cy  | -0.03 | 7.03 | 7.87E-01 |
| VPS36         | vacuolar prote   | 0.01  | 6.53 | 7.87E-01 |
| CD44          | CD44 molecule    | 0.01  | 8.30 | 7.91E-01 |
| SOCS6         | suppressor of    | 0.07  | 1.04 | 7.91E-01 |
| FAM53C        | family with sec  | -0.02 | 4.73 | 7.97E-01 |
| COPS4         | COP9 signalosc   | -0.01 | 4.95 | 7.98E-01 |
| CSNK2A1       | casein kinase 2  | -0.01 | 6.15 | 7.99E-01 |
| MARCH6        | membrane ass     | 0.01  | 7.97 | 8.01E-01 |
| NPTN          | neuroplastin [5  | 0.02  | 5.93 | 8.03E-01 |
| KLHL9         | kelch like fami  | 0.02  | 5.32 | 8.03E-01 |
| IGF1R         | insulin like gro | 0.04  | 5.68 | 8.13E-01 |
| FNDC3B        | fibronectin typ  | 0.02  | 3.71 | 8.15E-01 |
| CBFB          | core-binding fa  | -0.01 | 6.92 | 8.16E-01 |
| SLC31A1       | solute carrier f | 0.03  | 2.77 | 8.16E-01 |
| ZNF493        | zinc finger pro  | 0.02  | 4.63 | 8.19E-01 |
| DDI2          | DNA damage i     | 0.01  | 5.28 | 8.21E-01 |
| KRIT1         | KRIT1, ankyrin   | -0.01 | 5.68 | 8.22E-01 |
| FOXN2         | forkhead box f   | 0.02  | 6.48 | 8.26E-01 |
| FAM20B        | family with sec  | 0.01  | 5.32 | 8.27E-01 |
| MED13         | mediator comj    | 0.01  | 6.02 | 8.31E-01 |
| ZNF148        | zinc finger pro  | 0.01  | 5.56 | 8.32E-01 |
| SPIN1         | spindlin 1 [Sou  | -0.01 | 5.84 | 8.34E-01 |
| KANSL1L       | KAT8 regulator   | -0.03 | 3.22 | 8.38E-01 |
| <b>FAM63B</b> | family with sec  | 0.02  | 4.99 | 8.39E-01 |
| MARCKSL1      | MARCKS like 1    | -0.02 | 6.60 | 8.45E-01 |
| CBX5          | chromobox 5 [    | 0.01  | 6.29 | 8.47E-01 |
| ABAT          | 4-aminobutyra    | 0.01  | 3.40 | 8.48E-01 |
| PGM3          | phosphogluco     | 0.01  | 4.44 | 8.49E-01 |
| CLNS1A        | chloride nucle   | 0.01  | 6.16 | 8.49E-01 |
| PTK2          | protein tyrosir  | 0.03  | 2.26 | 8.49E-01 |
| NUFIP2        | NUFIP2, FMR1     | -0.01 | 7.11 | 8.64E-01 |
| ALPP          | alkaline phosp   | -0.05 | 0.81 | 8.68E-01 |
| EFR3A         | EFR3 homolog     | 0.01  | 6.14 | 8.70E-01 |
| RAB1A         | RAB1A, memb      | -0.01 | 6.55 | 8.73E-01 |
| WDR3          | WD repeat doi    | -0.01 | 5.29 | 8.73E-01 |
| TAF5          | TATA-box bind    | -0.02 | 4.19 | 8.75E-01 |
| IRF2BPL       | interferon regi  | -0.02 | 5.08 | 8.79E-01 |

|                 |                     |       |      |          |
|-----------------|---------------------|-------|------|----------|
| CD164           | CD164 molecu        | -0.01 | 7.54 | 8.80E-01 |
| MTPN            | myotrophin [S       | -0.01 | 7.32 | 8.82E-01 |
| PRKAB2          | protein kinase      | 0.01  | 5.80 | 8.84E-01 |
| RC3H2           | ring finger and     | 0.01  | 6.01 | 8.86E-01 |
| PITHD1          | PITH domain c       | -0.01 | 6.57 | 8.87E-01 |
| SUB1            | SUB1 homolog        | -0.01 | 6.56 | 8.89E-01 |
| MRPS10          | mitochondrial       | -0.01 | 5.78 | 8.91E-01 |
| <b>FBXO11</b>   | F-box protein :     | 0.00  | 6.64 | 8.93E-01 |
| SEMA5A          | semaphorin 5/       | -0.04 | 1.13 | 8.98E-01 |
| LYRM2           | LYR motif cont      | -0.01 | 3.78 | 9.01E-01 |
| SERAC1          | serine active si    | -0.01 | 2.92 | 9.08E-01 |
| CLIC2           | chloride intrac     | -0.03 | 0.90 | 9.22E-01 |
| USP1            | ubiquitin speci     | 0.01  | 6.53 | 9.27E-01 |
| USP47           | ubiquitin speci     | 0.00  | 6.01 | 9.27E-01 |
| KLF5            | Kruppel like fa     | -0.02 | 2.89 | 9.34E-01 |
| EFHD2           | EF-hand doma        | -0.02 | 6.91 | 9.37E-01 |
| <b>EIF4EBP2</b> | eukaryotic trar     | 0.00  | 7.12 | 9.40E-01 |
| BEX3            | brain expresse      | 0.01  | 5.63 | 9.49E-01 |
| UHRF1BP1L       | UHRF1 binding       | 0.00  | 4.33 | 9.52E-01 |
| DDHD2           | DDHD domain         | 0.00  | 5.68 | 9.52E-01 |
| WHSC1L1         | Wolf-Hirschho       | 0.00  | 6.89 | 9.57E-01 |
| OSBPL3          | oxysterol bindi     | 0.00  | 5.73 | 9.61E-01 |
| MXD1            | MAX dimerizat       | 0.00  | 4.36 | 9.68E-01 |
| SUSD6           | sushi domain c      | 0.00  | 6.55 | 9.70E-01 |
| LPGAT1          | lysophosphatic      | 0.00  | 5.45 | 9.76E-01 |
| LARP4           | La ribonucleop      | 0.00  | 4.77 | 9.79E-01 |
| ARMC8           | armadillo repe      | 0.00  | 5.17 | 9.83E-01 |
| ZBTB34          | zinc finger and     | 0.00  | 3.83 | 9.84E-01 |
| PIK3C2A         | phosphatidylir      | 0.00  | 5.43 | 9.95E-01 |
| RNF11           | ring finger pro     | 0.00  | 6.45 | 9.96E-01 |
| RUFY3           | RUN and FYVE        | 0.00  | 4.73 | 9.96E-01 |
| TSPAN2          | tetraspanin 2 [     | 0.00  | 4.10 | 9.99E-01 |
| <b>RASGRP1</b>  | RAS guanyl rel      | 0.00  | 8.41 | 9.99E-01 |
| HK2             | hexokinase 2 [      | 0.00  | 3.94 | 1.00E+00 |
| GPRC5A          | G protein-coupl     |       |      |          |
| LIMCH1          | LIM and calpoi      |       |      |          |
| HOXA9           | homeobox A9 -       |       |      |          |
| TNS1            | tensin 1 [Sourc     |       |      |          |
| TGFB2           | transforming g-     |       |      |          |
| JADE3           | jade family PH -    |       |      |          |
| JPH1            | junctionophilin 1 - |       |      |          |
| COL12A1         | collagen type )-    |       |      |          |
| LIFR            | leukemia inhib -    |       |      |          |
| PEX5L           | peroxisomal bi-     |       |      |          |

|           |                  |
|-----------|------------------|
| DLX2      | distal-less hom  |
| PRRX1     | paired related   |
| PCDH17    | protocadherin    |
| PTGFR     | prostaglandin    |
| KIAA1549  | KIAA1549 [Sou    |
| CALD1     | caldesmon 1 [S   |
| SOX9      | SRY-box 9 [Sou   |
| HRK       | harakiri, BCL2   |
| PRRG4     | proline rich an  |
| LAMC1     | laminin subuni   |
| IL10      | interleukin 10   |
| ARHGAP24  | Rho GTPase ac    |
| OSR1      | odd-skipped re   |
| THRB      | thyroid hormo    |
| TMEM56    | transmembrar     |
| DDAH1     | dimethylargini   |
| ENAH      | enabled homo     |
| IGF2BP1   | insulin like gro |
| PLPP3     | phospholipid p   |
| PRKAA2    | protein kinase   |
| NIPAL1    | NIPA like doma   |
| PRICKLE2  | prickle planar   |
| EDIL3     | EGF like repea   |
| TNFRSF11B | TNF receptor s   |
| ALDH1A1   | aldehyde dehy    |
| ST5       | suppression of   |
| CXCL10    | C-X-C motif ch   |
| ANO5      | anoctamin 5 [S   |
| GNG12     | G protein subu   |
| OLR1      | oxidized low d   |
| B3GNT5    | UDP-GlcNAc:b     |
| SKIDA1    | SKI/DACH dorr    |
| SOX2      | SRY-box 2 [Sou   |
| PAPPA     | pappalysin 1 [S  |
| MARC1     | mitochondrial    |
| SAMD5     | sterile alpha m  |
| SERPINB5  | serpin family B  |
| TOMM6     | translocase of   |
| RAB6C     | RAB6C, memb      |
| GTF2I     | general transci  |
| ZNF595    | zinc finger pro  |
